# Supplementary material for: Clinical significance of serum omentin-1 levels in patients with pancreatic adenocarcinoma
Source: PubMed Central journal article supplement (PMC5079241; doi:10.1016/j.bbacli.2016.10.002), 2016-10-15
Supplement: mmc1.pdf [file mmc1.pdf]

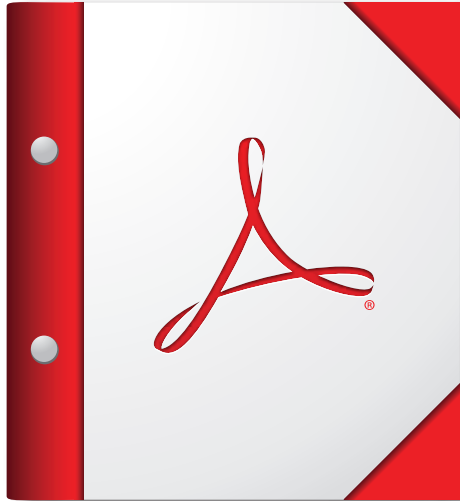

**For the best experience, open this PDF portfolio in  
Acrobat 9 or Adobe Reader 9, or later.**

[Get Adobe Reader Now!](#)
